# Supplementary material for: Metabolic memory underlying minimal residual disease in breast cancer
Source: PubMed Central journal article supplement (PMC8543468; doi:10.15252/msb.202010141), 2021-10-25
Supplement: MSB-17-e10141-s003.pdf [file MSB-17-e10141-s003.pdf]

## Table of Contents

**Appendix Figure S1:** Effect of doxycycline concentration on the phenotype, tumor induction and mitochondrial function.

**Appendix Figure S2:** Transcriptome data analysis of significantly altered gene subsets shows the distinctiveness of residual cells, identifying enrichment of pathways involved in repolarization process and metabolic alterations seen in the tumor cells.

**Appendix Figure S3:** Set-up of metabolic methods for 3D cultures aimed at harvesting metabolites of organoid populations with an improved signal of intracellular metabolites following matrix digestion.

**Appendix Figure S4:** Principal component analyses (PCA) of additional omics layers reveals the resemblance of residual cells to the tumor cells.

**Appendix Figure S5:** Analysis of measured intra- and extracellular metabolites demonstrates similarities between residual and tumor cells regarding their central carbon metabolism.

**Appendix Figure S6:** Global overview of altered metabolic pathways in tumor cells compared to normal in an extended representation.

**Appendix Figure S7:** Global overview of altered metabolic pathways in residual cells compared to normal in an extended representation.

**Appendix Figure S8:** Transcript expression of genes from the Oxidative Phosphorylation (OXPHOS) pathway in tumor and residual cells.

**Appendix Figure S9:** Immunofluorescence staining on mouse mammary tissue sections shows higher expression of Arginase1 in residual cells of regressed tissue as compared to normal cells of healthy tissue.

**Appendix Figure S10:** Extended validation of transcriptional changes in patient datasets.

**Appendix Figure S11:** Treatment with 3-bromopyruvate functionally validates an altered glycolysis in the residual cells.

**Appendix Figure S12:** Transcription factor activity analysis reveals a distinct HIF1 $\alpha$  signaling activity in residual cells.

**Appendix Figure S13:** DNA methylation analysis of promoter regions of HIF1, HIF1 glycolytic co-activator genes and selected HIF1 $\alpha$  target genes shows a consistent and isoform specific demethylation in tumor and residual cell populations.

**Appendix Table S1:** GO terms of significantly downregulated genes.

**Appendix Table S2:** GO terms of significantly upregulated genes.

**Appendix Table S3:** Footprinting based transcription factor enrichment of the residual cell population in comparison to normal and tumor.

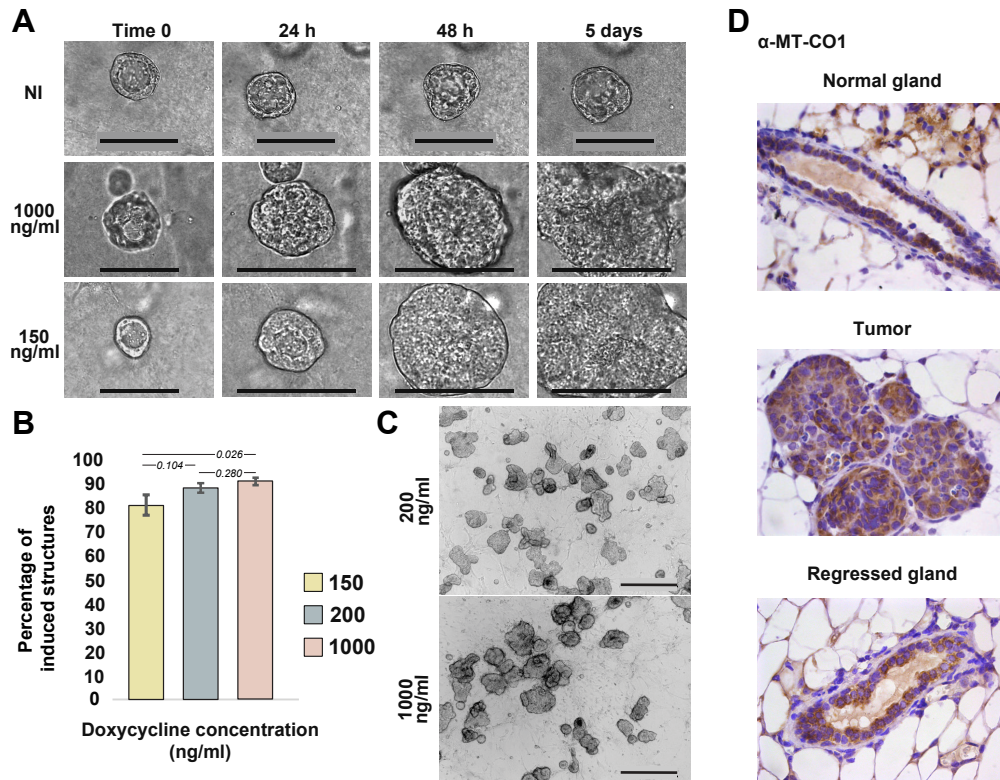

**Appendix Figure S1: Effect of doxycycline concentration on the phenotype, tumor induction and mitochondrial function.**

**A**, Representative bright field images of 3D cultures at indicated time points and doxycycline concentrations. Scale bar: 100  $\mu$ m.

**B**, Percentage of induced structures *in vitro* (5th day on doxycycline) at the concentrations of 150-(n=2), 200-(n=3) and 1000 ng/mL (n=3). Data shown as mean  $\pm$  SEM. Numbers marking comparisons show *p*-values (two-tailed t test).

**C**, Representative bright field images of induced structures on the 5th day on doxycycline at the concentration of 200 ng/mL (top) and 1000 ng/mL (bottom). Scale bar: 500  $\mu$ m.

**D**, IHC on MT-CO1 protein in mouse mammary gland tissue sections. Representative images from top to bottom: normal gland from age-matched control animal, tumor from an animal at 3 weeks on doxycycline, regressed gland from an animal at 2 weeks off doxycycline. Scale bar: 50  $\mu$ m.

Data information: **B**, Number of replicates corresponds to different animals.

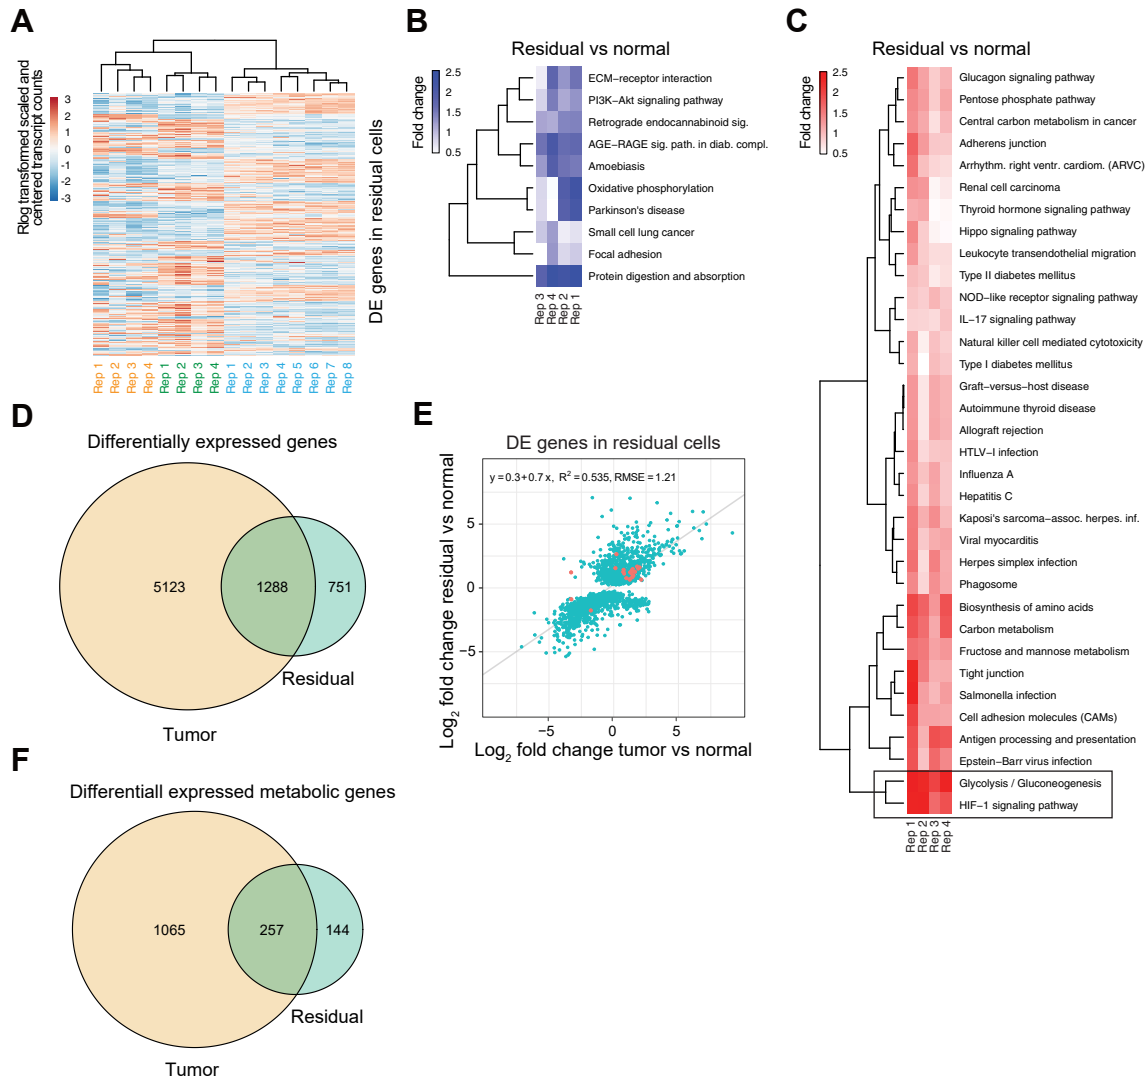

**Appendix Figure S2: Transcriptome data analysis of significantly altered gene subsets shows the distinctiveness of residual cells, identifying enrichment of pathways involved in repolarization process and metabolic alterations seen in the tumor cells.**

**A**, Heatmap with log transformed and gene-wise centered and scaled (stdv = 1) transcript counts of differentially expressed genes (two-sided Wald test (Love, Huber et al., 2014), Bonferroni adjusted  $p$ -value < 0.1) in residual cells compared to normal.

**B-C**, Heatmap of significantly enriched (**B**), downregulated and (**C**), upregulated KEGG pathways (unpaired one-side two-sample t-test,  $p$ -value < 0.05) of residual cells compared to normal. The enrichment was calculated from transcriptome derived log<sub>2</sub> fold changes. Clustering is based on the sample-wise calculated test statistics of the individual KEGG pathways (Methods).

**D**, Overlap of differentially expressed genes in tumor and residual cell populations compared to normal.

**E**, Scatter plot of differentially expressed genes of the residual cell population. Log<sub>2</sub> fold changes in comparison to normal are depicted, plotting the tumor against the residual population. Genes associated with glycolysis and the pentose phosphate pathway are highlighted in red.

**F**, Overlap of differentially expressed metabolic genes in tumor and residual cell populations compared to normal.

Data information: **A-F**, Number of replicates (normal n=8, tumor and residual n=4) corresponds to different animals. **A-C**, Hierarchical clustering with the complete linkage method and the Euclidean distance as a distance metric was used for clustering.

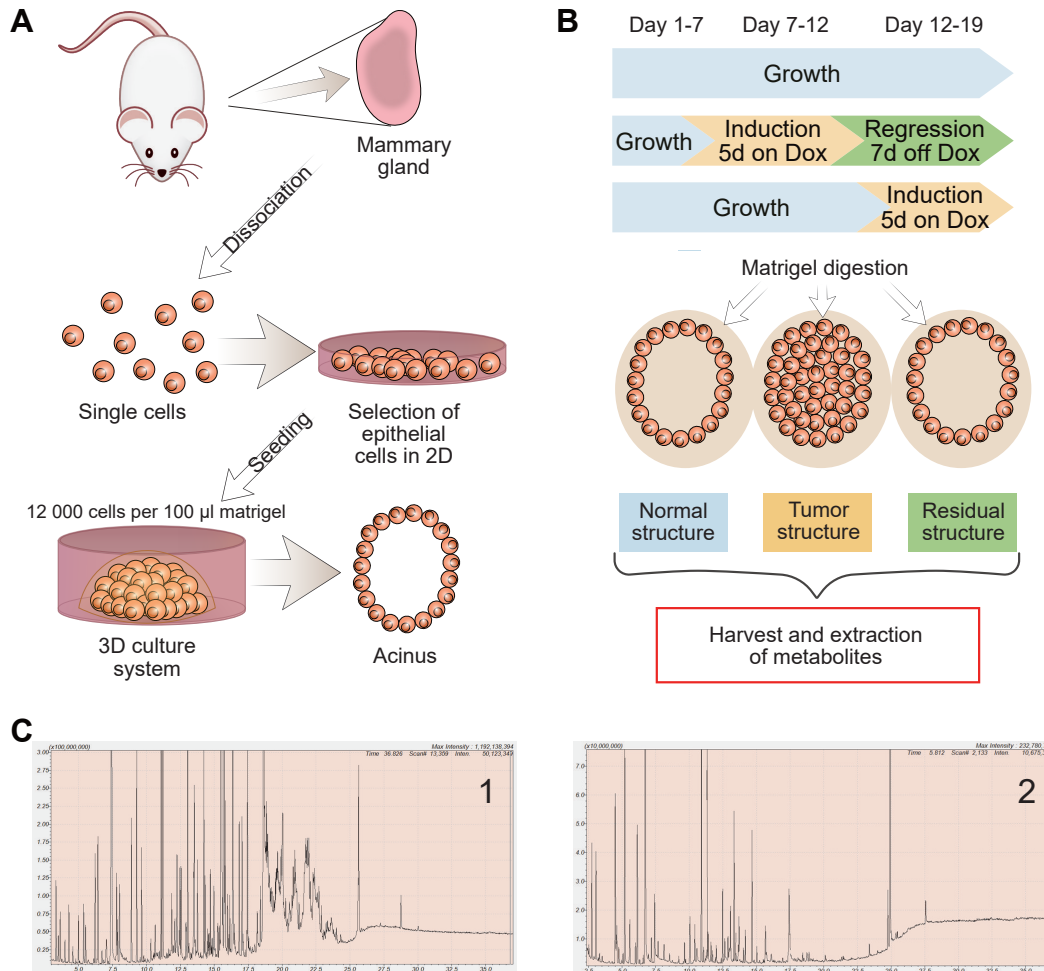

**Appendix Figure S3: Set-up of metabolic methods for 3D cultures aimed at harvesting metabolites of organoid populations with an improved signal of intracellular metabolites following matrix digestion.**

**A**, Primary epithelial cells obtained from mouse mammary glands are grown in Matrigel matrix, which enables growth in 3D and the formation of hollow acini.

**B**, Schematic timeline of the experiments showing the period of growth, tumor induction (5 days on doxycycline) and tumor regression (after doxycycline withdrawal, 7 days off). Experiments were designed in such a way that the metabolites from all three conditions (normal, tumor and residual) were harvested at the same endpoint after matrix gel digestion.

**C**, Representative total ion chromatograms showing a strong Matrigel matrix signal when no digestion is performed for the collection of structures (1), and an improved signal of intracellular metabolites after gel digestion (2).

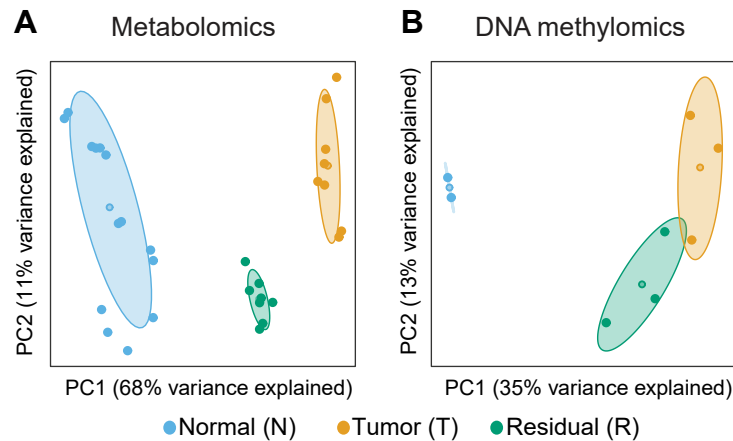

**Appendix Figure S4: Principal component analyses (PCA) of additional omics layers reveals the resemblance of residual cells to the tumor cells.**

**A**, PCA analysis of normal (blue; n=4, WT n=2), tumor (orange; n=3) and residual (green; n=3) populations based on the extracellular spent growth media targeted at central carbon metabolites. Centroids represent the mean and concentration ellipses represent one standard deviation (level=0.68) of an estimated t-distribution based on the first two principal components.

**B**, PCA analysis of normal (blue; n=2), tumor (orange; n=3) and residual (green; n=3) populations based on genome wide DNA methylation data. The ellipses are confidence ellipses with 0.99 normal probability and the centroids represent the geometric center of the ellipse. This ellipse type was chosen because of the low number of replicates.

Data information: **A-B**, Number of replicates corresponds to different animals.

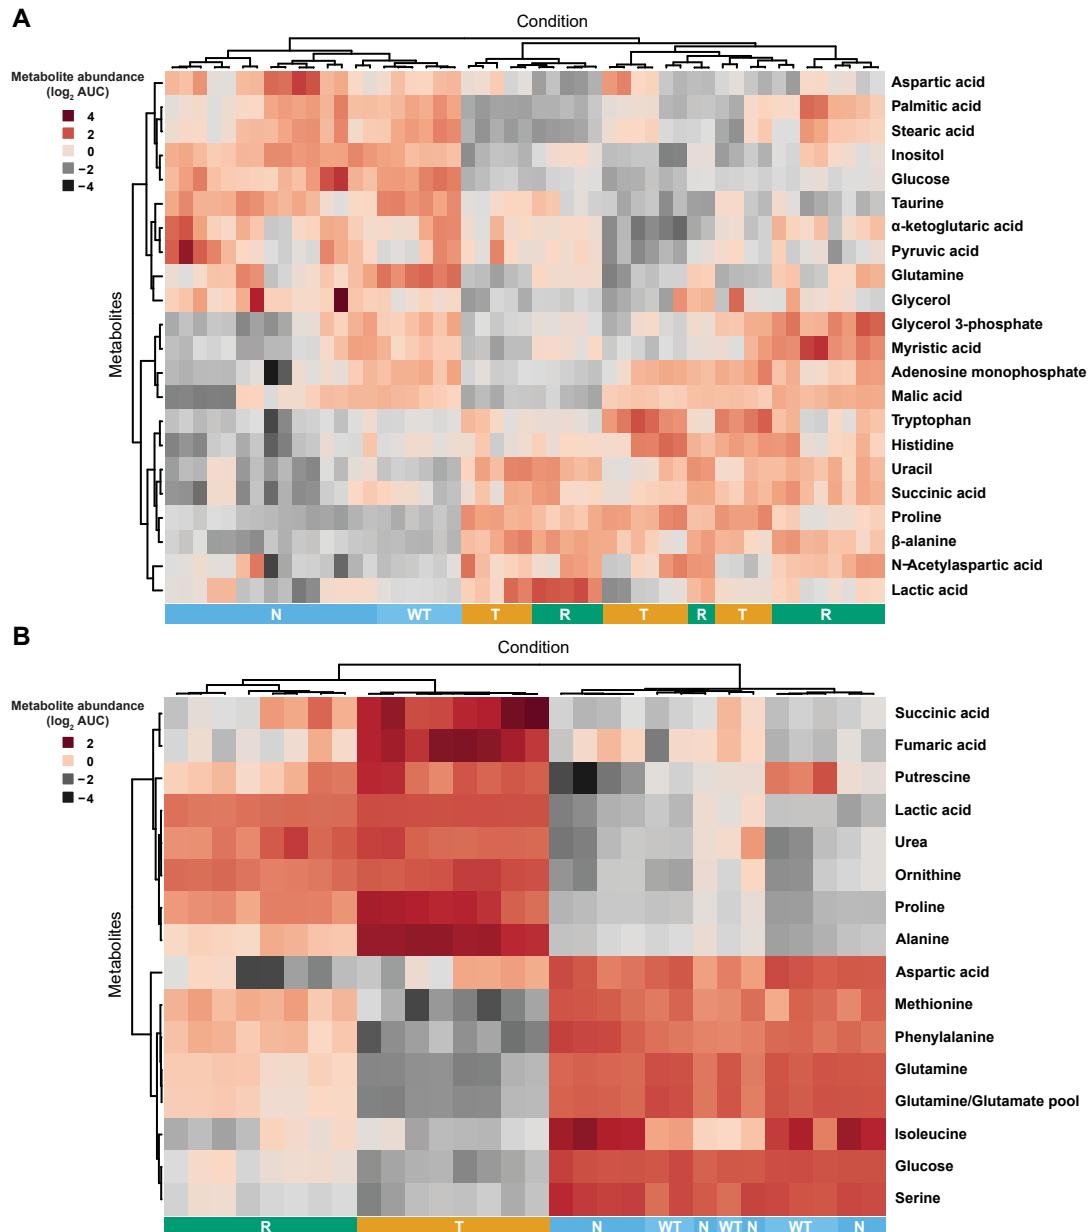

**Appendix Figure S5: Analysis of measured intra- and extracellular metabolites demonstrates similarities between residual and tumor cells regarding their central carbon metabolism.**

**A-B**, Heat maps representing the significantly altered metabolites in **(A)**, intracellular samples and **(B)**, extracellular spent growth media of residual (R, n=4) and tumor cells (T, n=4) compared to normal (N, n=4; WT n=2). The results are based on metabolomics analyses targeted at central carbon metabolites. The hierarchical clustering of the samples and the metabolites was based on Pearson's correlation using the complete linkage method. Statistics were calculated using the limma package (Ritchie, Phipson et al., 2015) in R with the significance threshold corresponding to a Benjamini-Hochberg adjusted  $p$ -value  $\leq 0.05$  (residual or tumor compared to normal). Values represent metabolite abundance levels as quantified by the area under the curve (AUC) of the marker fragment ions/transitions for each metabolite (log<sub>2</sub> scale). Number of replicates corresponds to different animals.

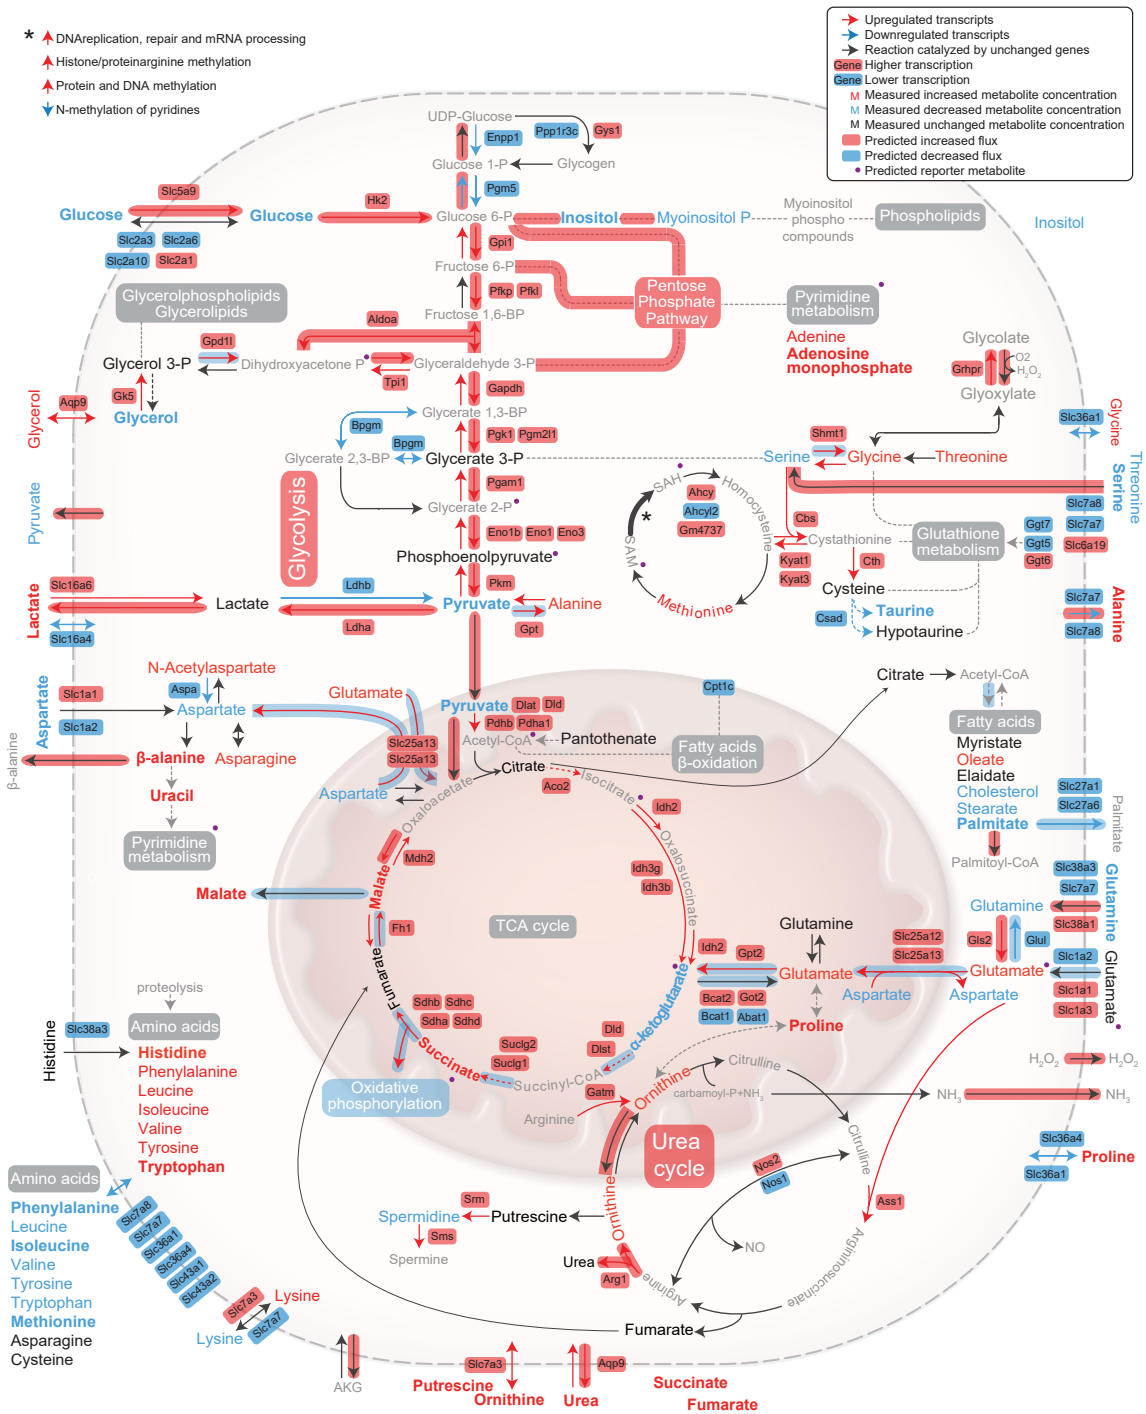

**Appendix Figure S6: Global overview of altered metabolic pathways in tumor cells compared to normal in an extended representation.**

A selection of genes with significantly altered expression (Bonferroni adjusted  $p$ -value < 0.1; normal  $n=8$ , tumor and residual  $n=4$ ), targeted metabolites with significantly altered levels (Benjamini-Hochberg adjusted  $p$ -value  $\leq 0.05$ ;  $n=8$ ; WT  $n=2$ ) and significant reporter metabolites (top 5% with  $p$ -value < 0.1) of core metabolic processes are presented. Metabolites with an additional  $\log_2$  fold change (tumor compared to normal)  $\geq 1$  or  $\leq -1$  are highlighted in bold. A two-sided Wald test with a Negative Binomial GLM (Love et al., 2014) was used as test statistics for gene expression. For metabolite levels,



statistics were calculated using the limma package (Ritchie et al., 2015) in R with the significance threshold corresponding to a Benjamini-Hochberg adjusted  $p$ -value  $\leq 0.05$  (tumor compared to normal). For the reporter metabolites a gene set enrichment analysis was performed from a theoretical null- distribution using the reporter method (Varemo, Nielsen et al., 2013). Metabolite-gene sets were derived from a genome wide human metabolic model (HMR2), with genes mapped to mouse orthologs (Mardinoglu, Agren et al., 2014). Flux balance analysis predicted metabolic fluxes, which are altered in the corresponding pathways are overlaid. Significantly altered gene expressions and metabolites were used to inform the predictions. Number of replicates corresponds to different animals.

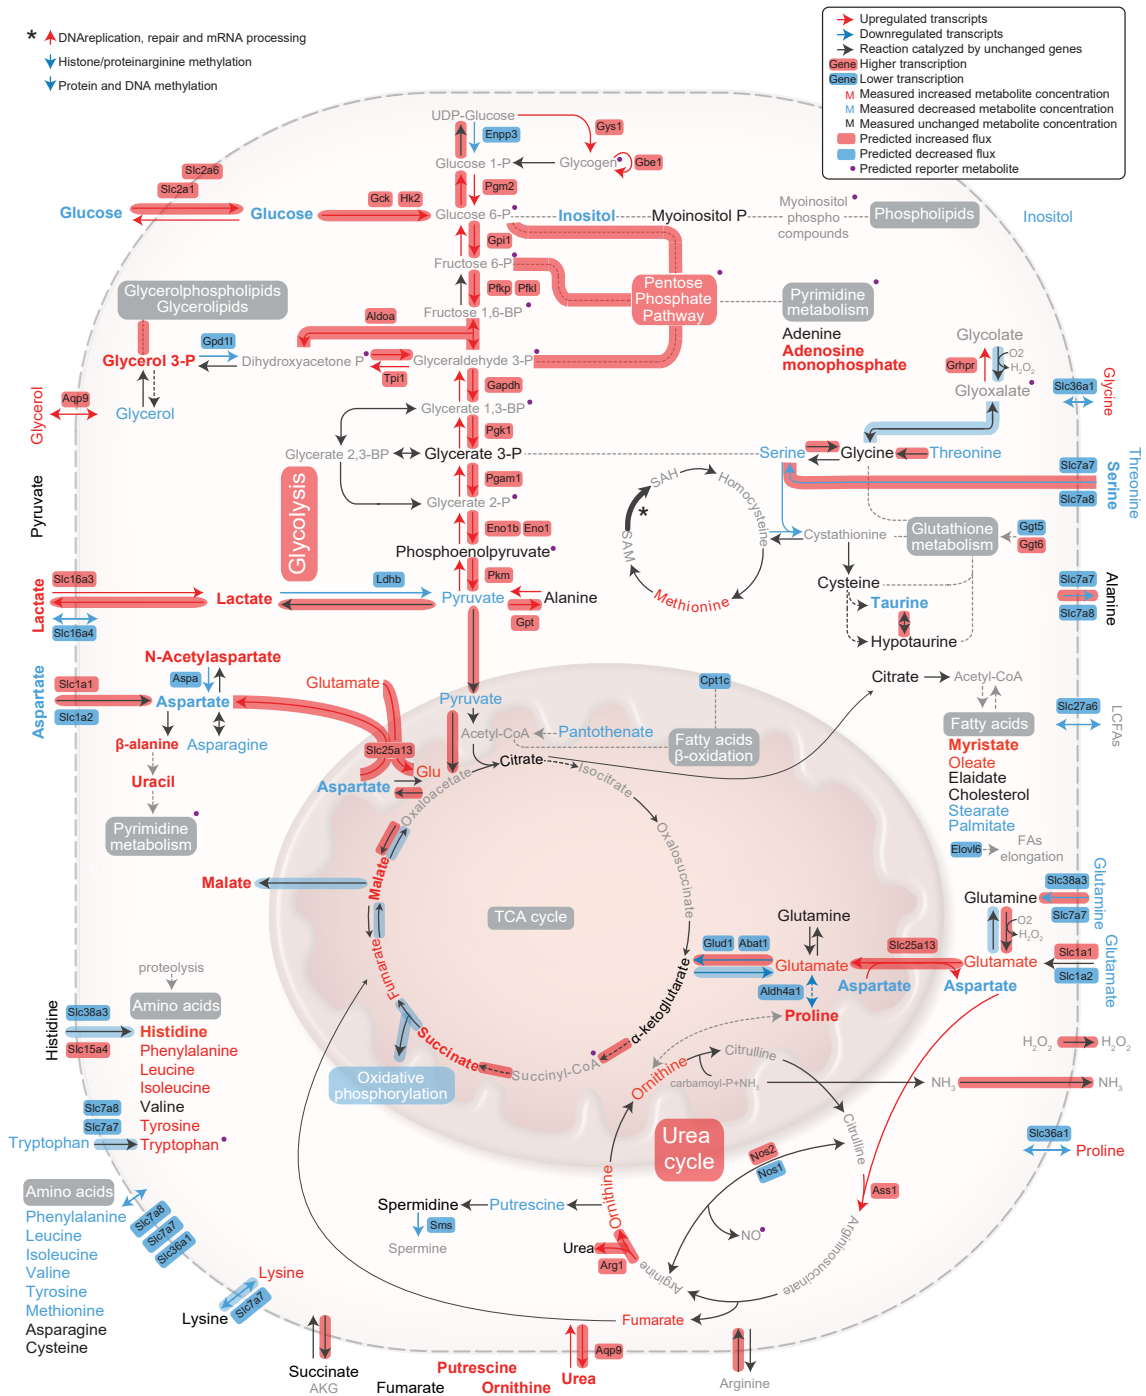

**Appendix Figure S7: Global overview of altered metabolic pathways in residual cells compared to normal in an extended representation.**

A selection of genes with significantly altered expression (Bonferroni adjusted  $p$ -value  $< 0.1$ ; normal  $n=8$ , tumor and residual  $n=4$ ), targeted metabolites with significantly altered levels (Benjamini-Hochberg adjusted  $p$ -value  $\leq 0.05$ ;  $n=8$ ; WT  $n=2$ ) and significant reporter metabolites (top 5% with  $p$ -value  $< 0.1$ ) of core metabolic processes are presented. Metabolites with an additional  $\log_2$  fold change (residual compared to normal)  $\geq 1$  or  $\leq -1$  are highlighted in bold. A two-sided Wald test with a Negative Binomial GLM (Love et al., 2014) was used as test statistics for gene expression. For metabolite levels,

statistics were calculated using the limma package (Ritchie et al., 2015) in R with the significance threshold corresponding to a Benjamini-Hochberg adjusted  $p$ -value  $\leq 0.05$  (tumor compared to normal). For the reporter metabolites a gene set enrichment analysis was performed from a theoretical null-distribution using the reporter method (Varemo et al., 2013). Metabolite-gene sets were derived from a genome wide human metabolic model (HMR2), with genes mapped to mouse orthologs (Mardinoglu et al., 2014). Flux balance analysis predicted metabolic fluxes, which are altered in the corresponding pathways are overlaid. Significantly altered gene expressions and metabolites were used to inform the predictions. Number of replicates corresponds to different animals.



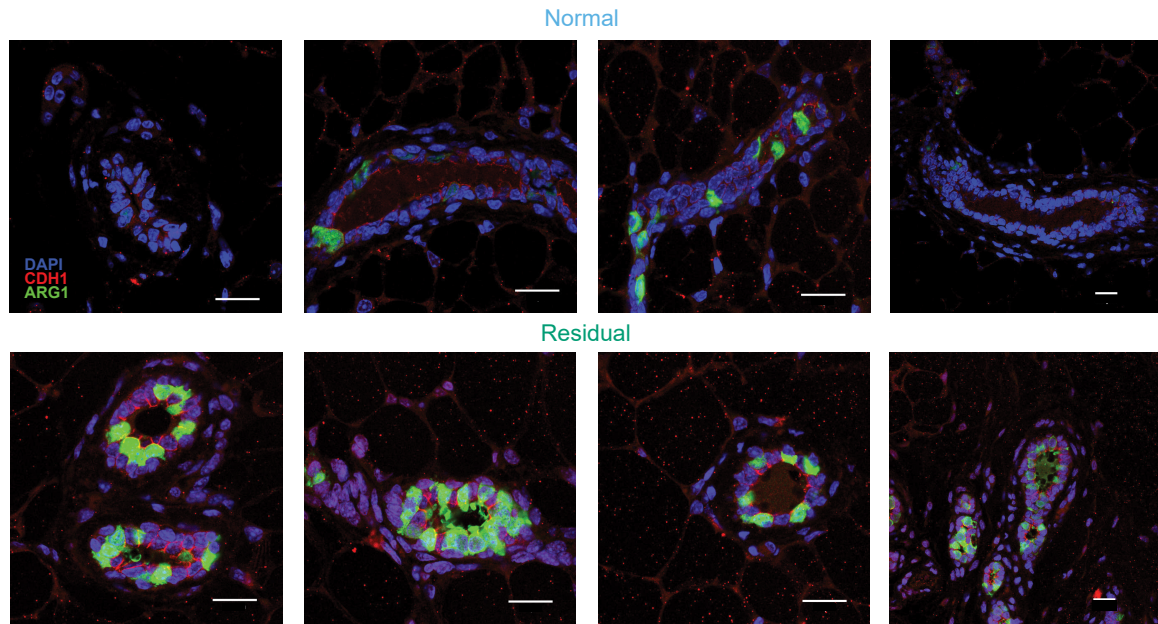

**Appendix Figure S9: Immunofluorescence staining on mouse mammary tissue sections shows higher expression of Arginase1 in residual cells of regressed tissue as compared to normal cells of healthy tissue.**

Representative images from staining of healthy (top) and residual ducts (bottom). Scale bar: 20  $\mu$ m. Immunofluorescence: DAPI (blue), CDH1 (red), ARG1 (green).

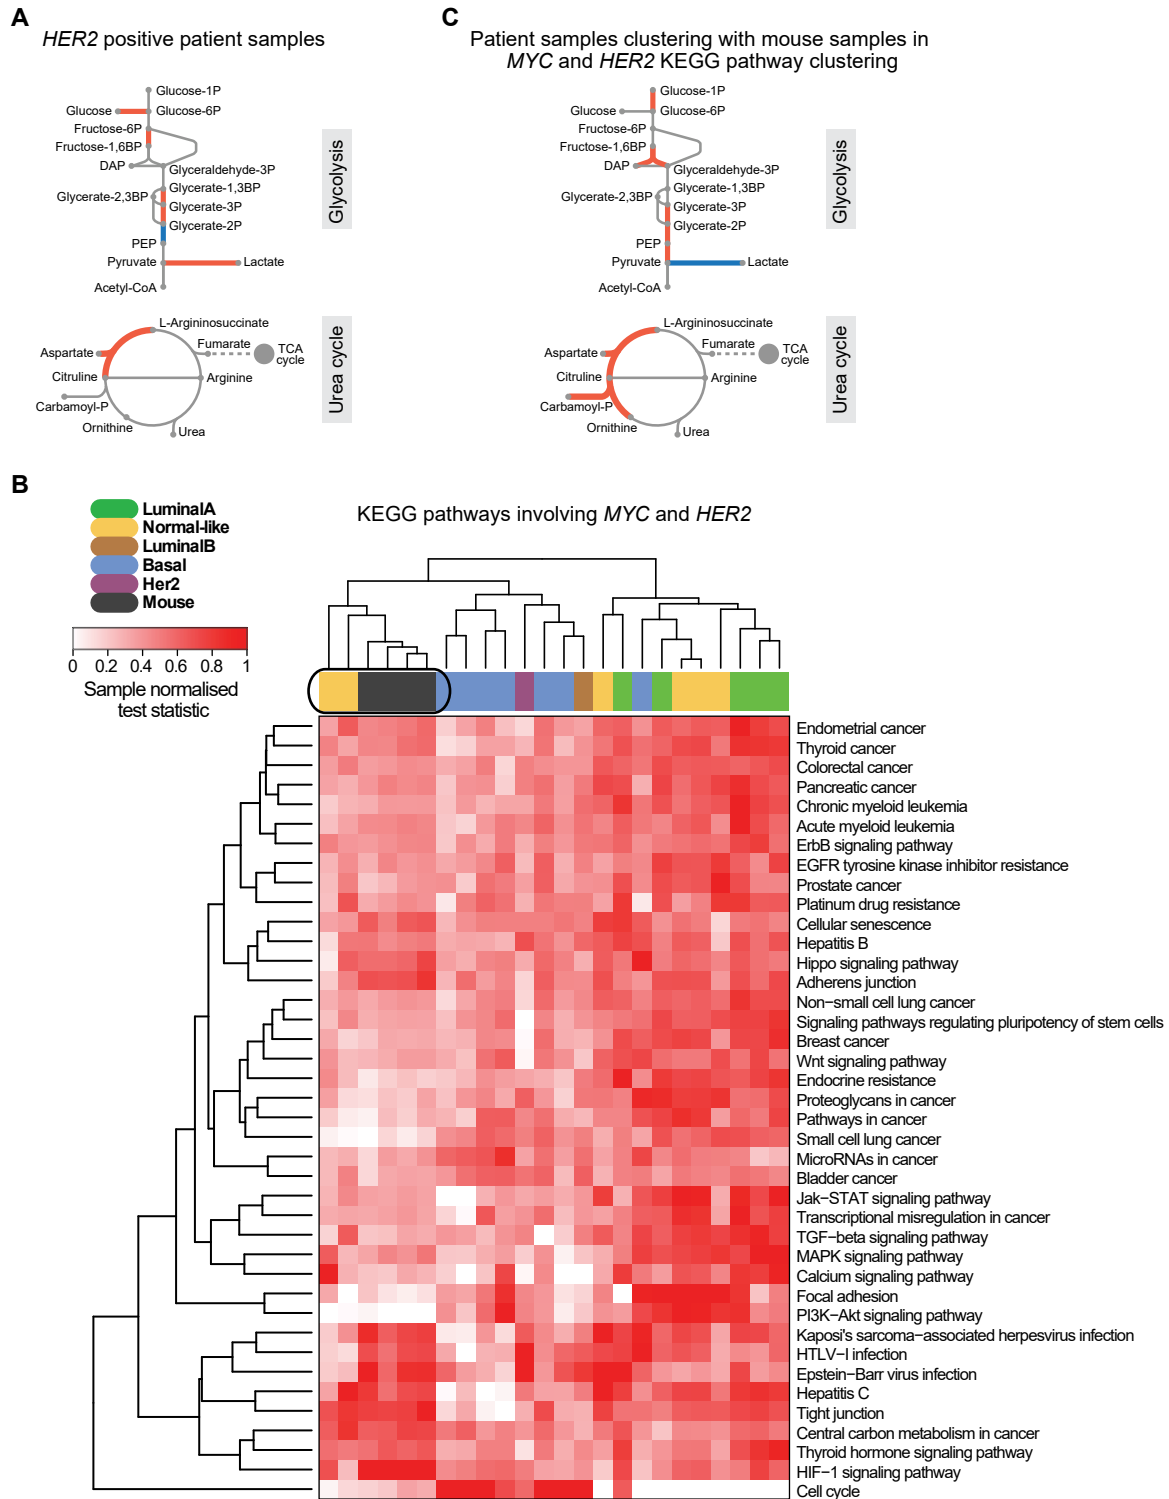

**Appendix Figure S10: Extended validation of transcriptional changes in patient datasets.**

**A**, Metabolic reactions of glycolysis and urea cycle, which are catalyzed by enzymes with differential expression ( $p$ -value < 0.05), are highlighted in red. An empirical Bayes moderated t-statistics was computed from a gene wise linear model fit with generalized least squares (Ritchie et al., 2015), comparing *HER2* positive classified patients ( $n=3$  samples) with healthy breast tissue ( $n=10$  samples). Differential expression from mouse *in vitro* transcriptome data of residual versus normal samples are depicted in Fig. 3G.

**B**, Joint clustering of sample-wise normalized individual pathway enrichment test statistics (unpaired one-side two-sample t-test) of mouse model (RNA-seq; normal, n=8; residual n=4) and patient samples (microarray; healthy, n=10, regressed n=20). Clustering is based on all genes of human KEGG pathways (or their mouse orthologs) that involve *HER2* or *MYC* (Methods). Hierarchical clustering with the complete linkage method and the Euclidean distance as a distance metric was used for clustering. For the patient comparison, two independent datasets, one from healthy breast tissue (GSE65194) (Maire et al., 2013, Maubant, Tesson et al., 2015) and one from patient tissues after neoadjuvant treatment (GSE32072) (Gonzalez-Angulo et al., 2012), were merged.

**C**, Metabolic reactions of glycolysis and urea cycle, which are catalyzed by enzymes with differential expression ( $p$ -value < 0.05), are highlighted in red. An empirical Bayes moderated t-statistics was computed from a gene wise linear model fit with generalized least squares (Ritchie et al., 2015), comparing the treated patients (n=4 samples), which are clustering closely with the mouse samples (encircled in **(B)**) with healthy breast tissue (n=10 samples). Differential expression from mouse *in vitro* transcriptome data of residual versus normal samples are depicted in Fig. 3G.

Data information: **A-C**, Number of replicates corresponds to different animals.

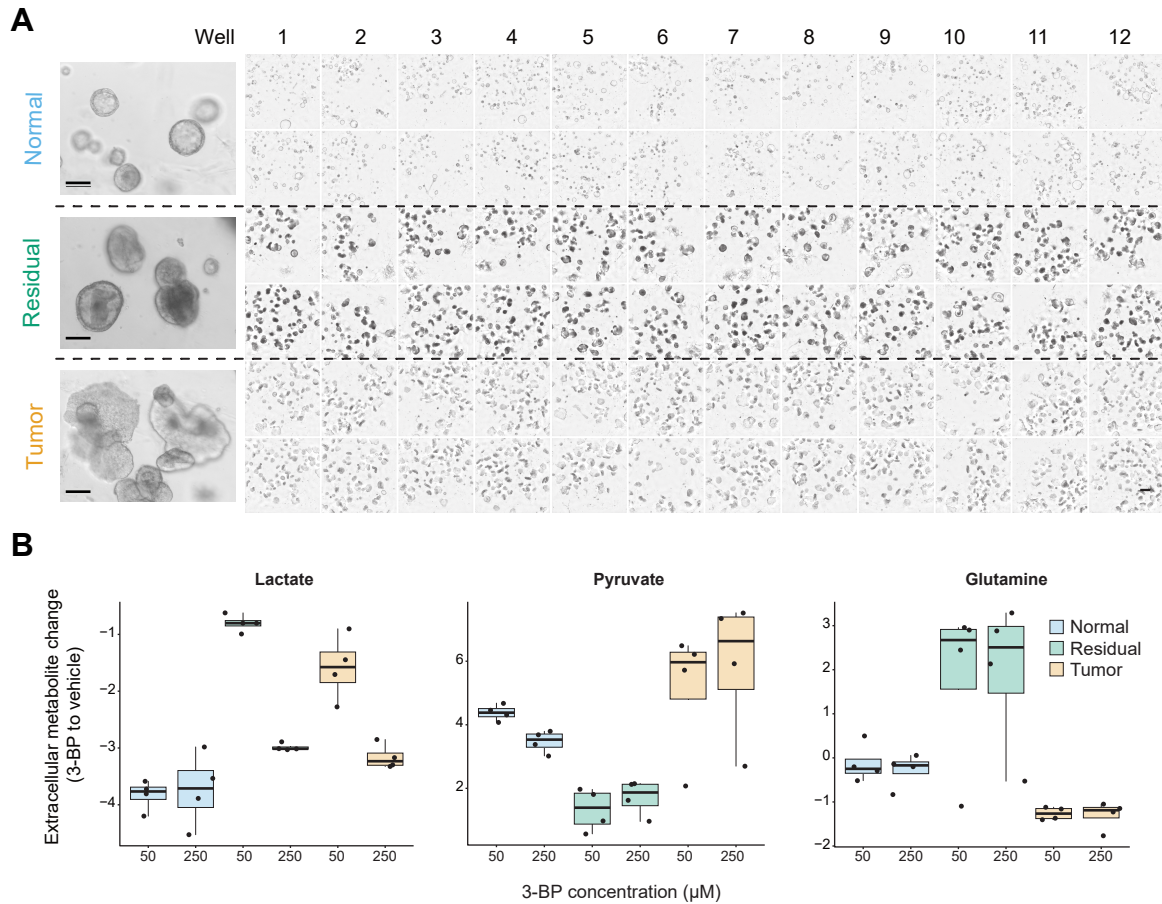

**Appendix Figure S11: Treatment with 3-bromopyruvate functionally validates an altered glycolysis in the residual cells.**

**A**, Representative bright field images in transmission showing 12 columns/6 rows of a 96-well plate containing normal (2 top rows), residual (2 middle rows) and tumor (2 bottom rows) structures before treatment with 3-BP; left panels representative enlarged images; scale bar 100  $\mu\text{m}$  (left panel) and 500  $\mu\text{m}$  (right panel).

**B**, Alteration of extracellular metabolite abundance levels in all three populations after treatment with 3-BP ( $n=4$  each). The values represent the metabolite abundance ratio of 3-BP treated to untreated cells. Box plots: midline, median; box, 25–75th percentile; whisker, minimum to maximum. Number of replicates corresponds to different animals.



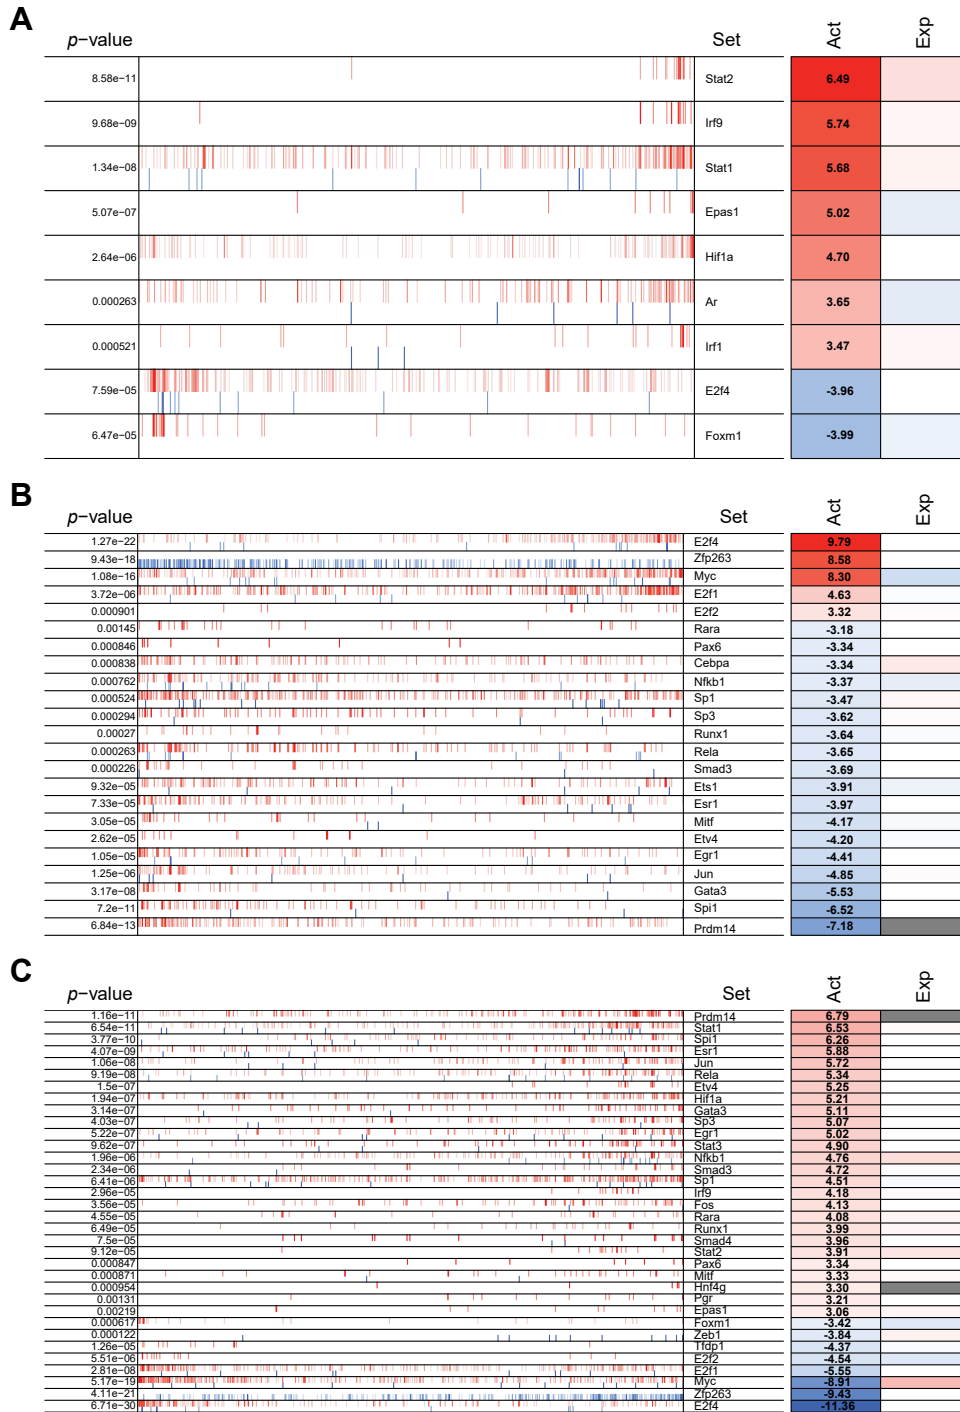

**Appendix Figure S12: Transcription factor activity analysis reveals a distinct HIF1 $\alpha$  signaling activity in residual cells.**

**A-C**, Transcription factor (TF) activities were assessed with a footprinting based enrichment method using the differential gene expression of TF targets as an estimate for TF activity. Estimated activities (Act) are shown for significant TFs (Benjamini-Hochberg adjusted  $p \leq 0.01$ ) comparing **(A)**, residual versus normal **(B)**, tumor versus normal and tumor versus normal and **(C)**, residual versus tumor. Differentially expressed genes between the respective populations (two-sided Wald test, Bonferroni adjusted  $p$ -value  $< 0.1$ ) and mouse transcription factor regulons (regulated target genes) from the bioconductor package “dorothea” with confidence levels “A” and “B” (Holland, Szalai et

al., 2020) were used as input for the msViper algorithm to calculate the activity (Alvarez, Shen et al., 2016). The bars in middle plot represent the whole regulon of the respective transcription factor with genes depicted in red being transcriptionally activated and in blue being transcriptionally inhibited by the respective transcription factor. The coloring on the estimated activity (Act) and expected activity under the null hypothesis (Exp) represents the TF activity strength with red for more and blue for less active TFs. The number of replicates in the transcriptomics data (normal n=8, tumor and residual n=4) corresponds to different animals.

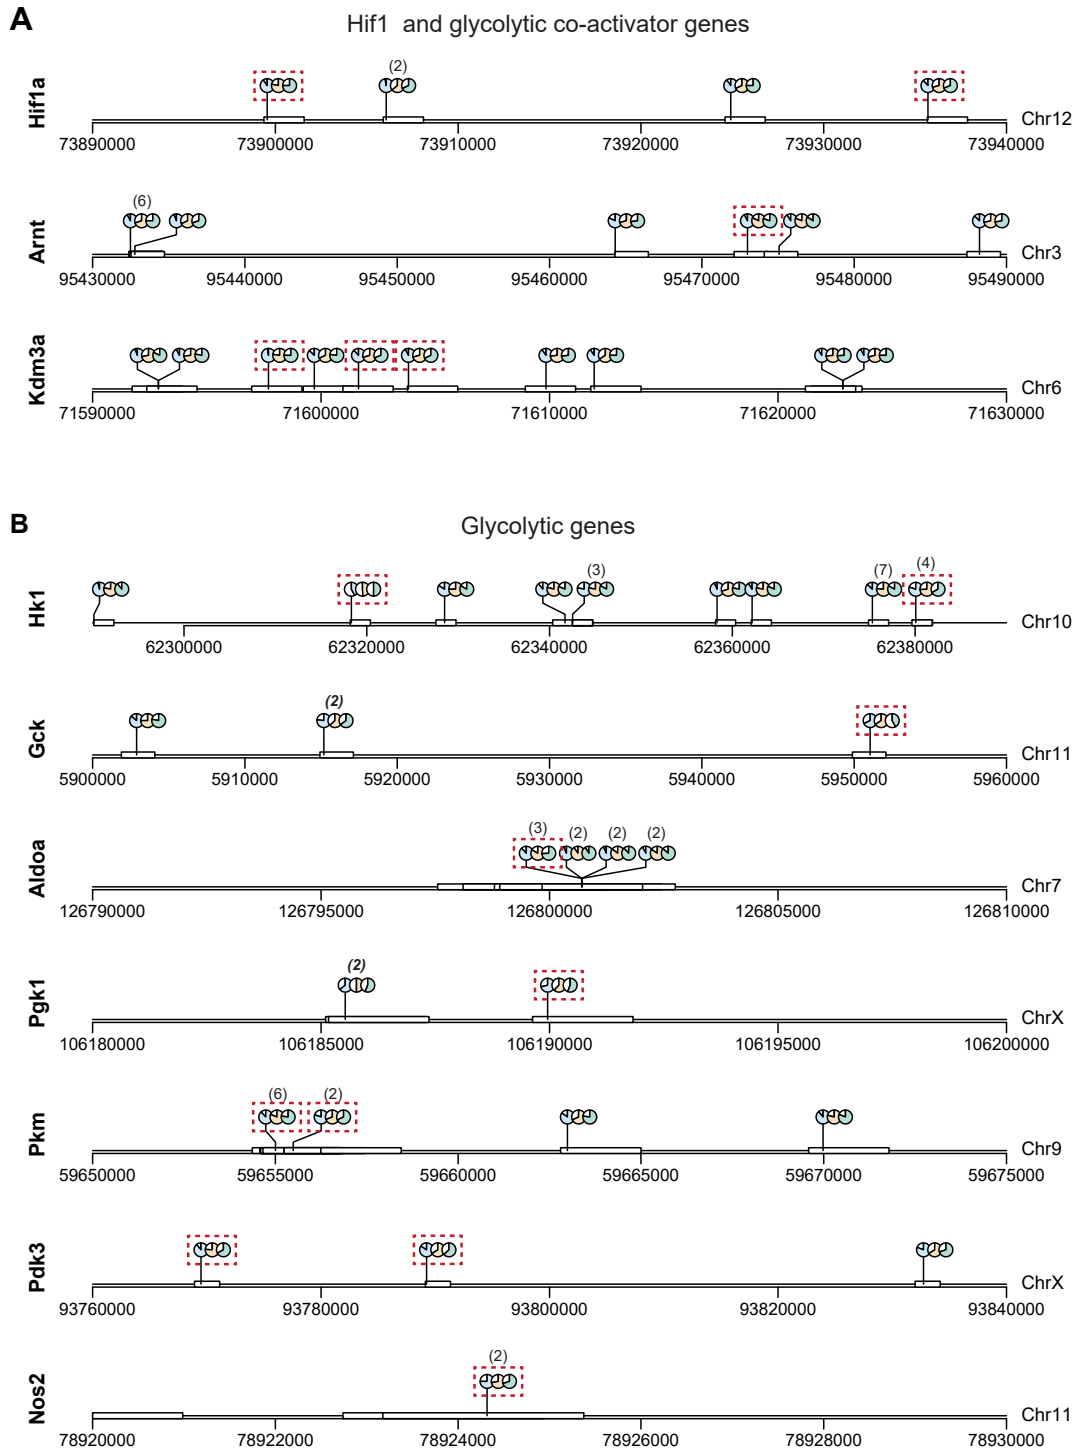

**Appendix Figure S13: DNA methylation analysis of promoter regions of HIF1, HIF1 glycolytic co-activator genes and selected HIF1 $\alpha$  target genes shows a consistent and isoform specific demethylation in tumor and residual cell populations.**

Methylation percentages of CpG sites (as measured by bisulfide sequencing) are depicted within selected gene promoter regions for the normal (blue), tumor (yellow) and residual (green) cell population. The promoter regions (2000bp upstream and 200bp down stream of transcription start site) are shown for each gene's isoform individually as rectangular bars at their genomic location. Within each promoter region, the methylation

percentages of all CpG site were averaged. Identical isoform methylation percentages in all three populations of different promoters are only shown once with the number in brackets above the depiction indicating the number of identical iso forms. Only CpG sites with a minimum of 5 aligned reads in every sample were quantified. The number of replicates (normal n=2, tumor and residual n=3) corresponds to different animals.

**Appendix Table S1: GO terms of significantly downregulated genes.** Significant gene ontology terms ( $p$ -value < 0.001) from the gene ontology biological processes enriched for downregulated differentially expressed genes (Bonferroni adjusted  $p$ -value < 0.1) in the comparison residual vs. normal. A one-sided Fisher's exact test was used as test statistics. Number of replicates (normal  $n=8$ , tumor and residual  $n=4$ ) corresponds to different animals.

| GO Term ID | Description                                                               | Number of significant terms |
|------------|---------------------------------------------------------------------------|-----------------------------|
| GO:0006260 | DNA replication                                                           | 3                           |
| GO:0006928 | movement of cell or subcellular component                                 | 1                           |
| GO:0007017 | microtubule-based process                                                 | 1                           |
| GO:0007049 | cell cycle                                                                | 1                           |
| GO:0007059 | chromosome segregation                                                    | 1                           |
| GO:0007154 | cell communication                                                        | 1                           |
| GO:0007155 | cell adhesion                                                             | 3                           |
| GO:0007188 | adenylate cyclase-modulating G-protein coupled receptor signaling pathway | 2                           |
| GO:0007267 | cell-cell signaling                                                       | 12                          |
| GO:0007610 | behavior                                                                  | 1                           |
| GO:0008283 | cell proliferation                                                        | 1                           |
| GO:0009190 | cyclic nucleotide biosynthetic process                                    | 16                          |
| GO:0009987 | cellular process                                                          | 1                           |
| GO:0019932 | second-messenger-mediated signaling                                       | 1                           |
| GO:0022610 | biological adhesion                                                       | 1                           |
| GO:0023052 | signaling                                                                 | 1                           |
| GO:0030198 | extracellular matrix organization                                         | 1                           |
| GO:0030334 | regulation of cell migration                                              | 8                           |
| GO:0032501 | multicellular organismal process                                          | 1                           |
| GO:0032502 | developmental process                                                     | 1                           |
| GO:0042127 | regulation of cell proliferation                                          | 1                           |
| GO:0043062 | extracellular structure organization                                      | 1                           |
| GO:0044699 | single-organism process                                                   | 1                           |
| GO:0044707 | single-multicellular organism process                                     | 37                          |
| GO:0044708 | single-organism behavior                                                  | 1                           |
| GO:0044763 | single-organism cellular process                                          | 1                           |
| GO:0044767 | single-organism developmental process                                     | 12                          |
| GO:0048285 | organelle fission                                                         | 17                          |
| GO:0048518 | positive regulation of biological process                                 | 1                           |
| GO:0048519 | negative regulation of biological process                                 | 3                           |
| GO:0048523 | negative regulation of cellular process                                   | 18                          |
| GO:0048583 | regulation of response to stimulus                                        | 1                           |
| GO:0050896 | response to stimulus                                                      | 1                           |
| GO:0051301 | cell division                                                             | 1                           |
| GO:0051302 | regulation of cell division                                               | 1                           |
| GO:0051303 | establishment of chromosome localization                                  | 2                           |
| GO:0055086 | nucleobase-containing small molecule metabolic process                    | 1                           |
| GO:0065007 | biological regulation                                                     | 1                           |
| GO:0071467 | cellular response to pH                                                   | 1                           |
| GO:0071840 | cellular component organization or biogenesis                             | 1                           |
| GO:1903047 | mitotic cell cycle process                                                | 36                          |
| GO:1905818 | regulation of chromosome separation                                       | 2                           |

**Appendix Table S2: GO terms of significantly upregulated genes.** Significant gene ontology terms ( $p$ -value < 0.001) from the gene ontology biological processes enriched for upregulated differentially expressed genes (Bonferroni adjusted  $p$ -value < 0.1) in the comparison residual vs. normal. A one-sided Fisher's exact test was used as test statistics. Number of replicates (normal  $n=8$ , tumor and residual  $n=4$ ) corresponds to different animals.

| GO Term ID | Description                                              | Number of significant terms |
|------------|----------------------------------------------------------|-----------------------------|
| GO:0001775 | cell activation                                          | 1                           |
| GO:0001816 | cytokine production                                      | 11                          |
| GO:0001906 | cell killing                                             | 1                           |
| GO:0001909 | leukocyte mediated cytotoxicity                          | 2                           |
| GO:0002376 | immune system process                                    | 1                           |
| GO:0002831 | regulation of response to biotic stimulus                | 1                           |
| GO:0006482 | protein demethylation                                    | 1                           |
| GO:0006915 | apoptotic process                                        | 2                           |
| GO:0006928 | movement of cell or subcellular component                | 1                           |
| GO:0006952 | defense response                                         | 8                           |
| GO:0006955 | immune response                                          | 69                          |
| GO:0007154 | cell communication                                       | 1                           |
| GO:0007166 | cell surface receptor signaling pathway                  | 10                          |
| GO:0008214 | protein dealkylation                                     | 1                           |
| GO:0008219 | cell death                                               | 1                           |
| GO:0008283 | cell proliferation                                       | 1                           |
| GO:0009132 | nucleoside diphosphate metabolic process                 | 17                          |
| GO:0009607 | response to biotic stimulus                              | 1                           |
| GO:0018108 | peptidyl-tyrosine phosphorylation                        | 6                           |
| GO:0022610 | biological adhesion                                      | 1                           |
| GO:0023052 | signaling                                                | 1                           |
| GO:0030029 | actin filament-based process                             | 1                           |
| GO:0030036 | actin cytoskeleton organization                          | 2                           |
| GO:0032501 | multicellular organismal process                         | 1                           |
| GO:0032502 | developmental process                                    | 1                           |
| GO:0032879 | regulation of localization                               | 1                           |
| GO:0034097 | response to cytokine                                     | 1                           |
| GO:0034330 | cell junction organization                               | 1                           |
| GO:0040011 | locomotion                                               | 1                           |
| GO:0040012 | regulation of locomotion                                 | 1                           |
| GO:0042107 | cytokine metabolic process                               | 1                           |
| GO:0042127 | regulation of cell proliferation                         | 2                           |
| GO:0044699 | single-organism process                                  | 1                           |
| GO:0044763 | single-organism cellular process                         | 1                           |
| GO:0045216 | cell-cell junction organization                          | 5                           |
| GO:0048518 | positive regulation of biological process                | 1                           |
| GO:0048519 | negative regulation of biological process                | 3                           |
| GO:0048522 | positive regulation of cellular process                  | 5                           |
| GO:0048523 | negative regulation of cellular process                  | 7                           |
| GO:0048856 | anatomical structure development                         | 29                          |
| GO:0050790 | regulation of catalytic activity                         | 21                          |
| GO:0050896 | response to stimulus                                     | 1                           |
| GO:0051270 | regulation of cellular component movement                | 4                           |
| GO:0051674 | localization of cell                                     | 1                           |
| GO:0065009 | regulation of molecular function                         | 1                           |
| GO:0070988 | demethylation                                            | 1                           |
| GO:0072524 | pyridine-containing compound metabolic process           | 1                           |
| GO:0090002 | establishment of protein localization to plasma membrane | 5                           |
| GO:0098609 | cell-cell adhesion                                       | 14                          |

**Appendix Table S3: Footprinting based transcription factor enrichment of the residual cell population in comparison to normal and tumor.**

The transcription factor (TF) enrichment was assessed by using the gene expression of TF target genes as an input for the enrichment calculation (footprinting approach). Genome-wide rlog transformed gene counts and mouse transcription factor regulons (regulated target genes) from the bioconductor package “dorothea” with confidence levels “A” and “B” (Holland et al., 2020) were used as input for the viper algorithm (Alvarez et al., 2016) to calculate the enrichment. Estimated activities are shown for significant TFs (Benjamini-Hochberg-adjusted  $p \leq 0.01$ ). The number of replicates in the transcriptomics data (normal n=8, tumor and residual n=4) corresponds to different animals.

**TF activities of the residual cell population**

| <b>TF</b> | <b>T-Value</b> | <b>P-Value</b> | <b>FDR</b> |
|-----------|----------------|----------------|------------|
| Hif1a     | 8.17           | 1.07E-06       | 0.000129   |
| Epas1     | 7.5            | 2.86E-06       | 0.000173   |
| Zeb1      | -6.95          | 6.75E-06       | 0.000272   |
| Fosl2     | 6.07           | 2.91E-05       | 0.000704   |
| Irf9      | 6.18           | 2.41E-05       | 0.000704   |
| Stat1     | 5.52           | 7.50E-05       | 0.001513   |
| Stat2     | 5.27           | 0.000118       | 0.001845   |
| Stat6     | 5.26           | 0.000122       | 0.001845   |
| Foxm1     | -5.05          | 0.000176       | 0.002366   |
| Mycn      | -4.65          | 0.000373       | 0.004513   |
| Esr1      | 4.23           | 0.000835       | 0.009185   |
